# Supplementary material
Source: bioRxiv or medRxiv preprint supplement (https://medrxiv.org/highwire/filestream/69077/field_highwire_adjunct_files/3/19006221-2.pdf)
Supplement: Supplementary file [file 19006221-2.pdf]

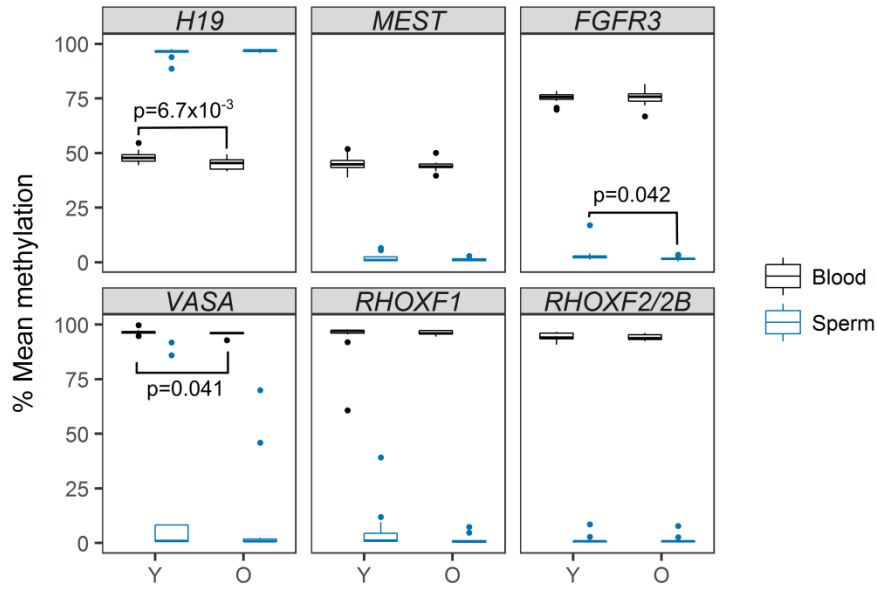

**Fig. S2.** Methylation of infertility-associated genes. Average DNA methylation levels of two imprinted genes (H19 and MEST) and four spermatogenesis-related genes (FGFR3, DDX4/VASA, RHOXF1, and RHOXF2/2B) were measured by deep bisulfite sequencing (DBS) in peripheral blood (black) and swim-up sperm (blue) from the youngest (Y) and oldest (O) age groups. Differences between age groups were tested by two-sided t-tests. Sample numbers: Group 1 (n=14) vs. Group 6 (n= 13) for blood, and Group 1 (n= 14) vs. Group 6 (n= 12) for sperm.
